# Supplementary material for: Dissimilarity of Airway and Lung Tissue Microbiota in Smokers Undergoing Surgery for Lung Cancer
Source: PubMed Central journal article supplement (PMC7355471; doi:10.3390/microorganisms8060794), 2020-05-26
Supplement: microorganisms-08-00794-s001.pdf [file microorganisms-08-00794-s001.pdf]

Supplement

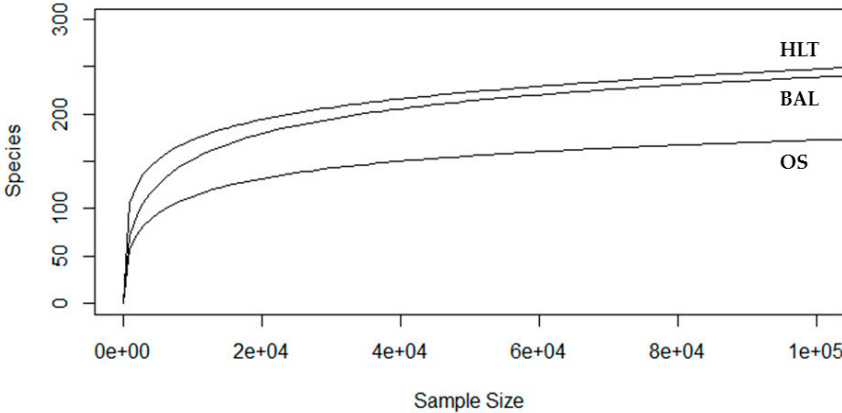

Figure S1: Rarefaction curve of the three groups (OS, BAL, HLT)

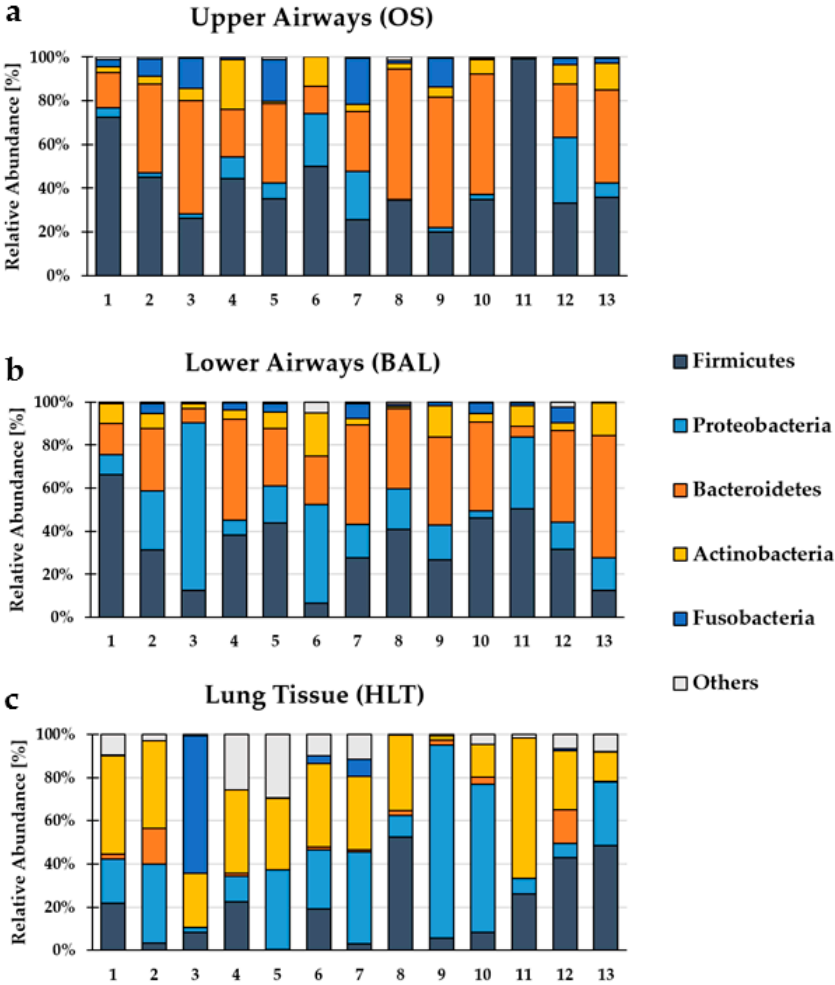

Figure S2. Distribution of the five most abundant phyla along the respiratory tract in the upper airways (a), lower airways (b) and lung tissue (c) of the 13 patients.

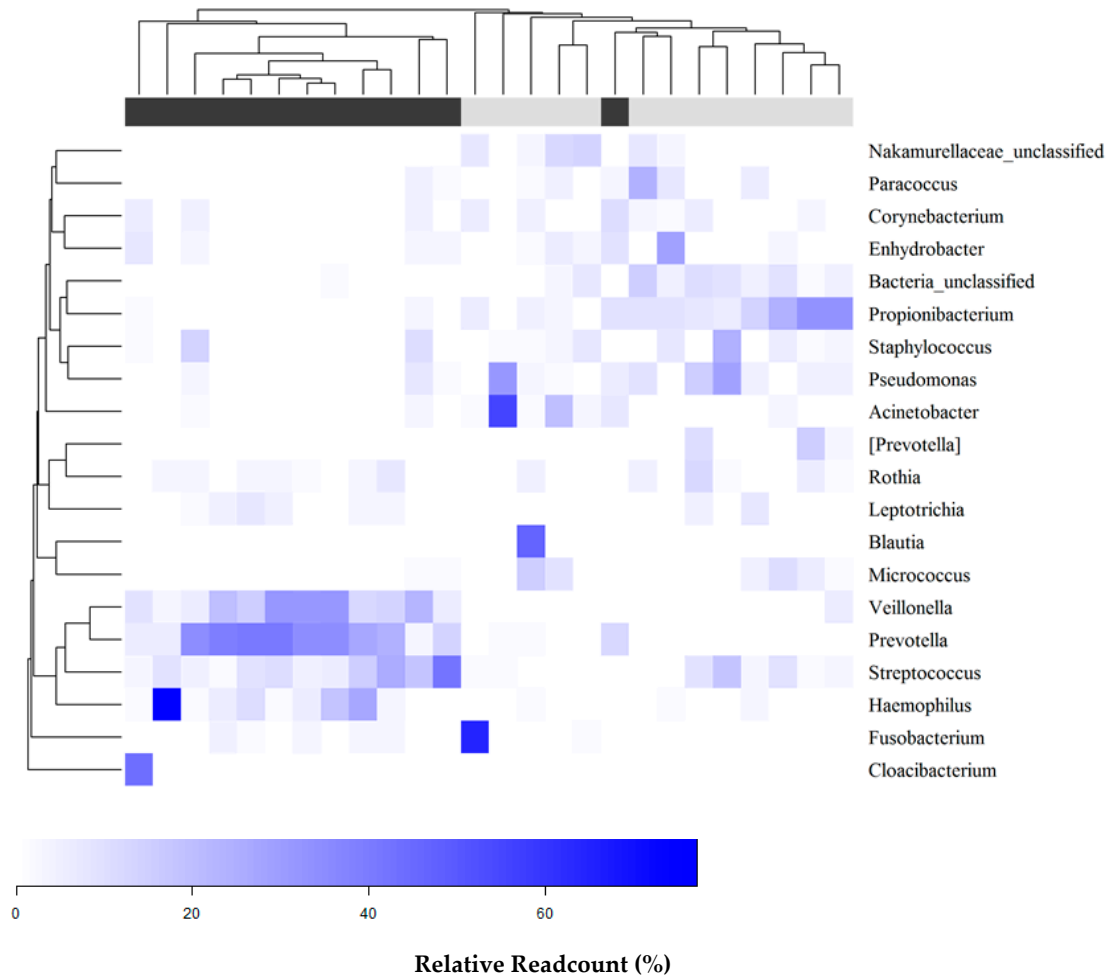

**Figure S3.** The distribution of genera clearly differs between lower airways and lung tissue. Each column corresponds to the samples of the lower airways (dark grey) and the lung tissue (light grey) from the 13 patients and were clustered hierarchical in two groups. Each row represents a bacterial genus. The 20 most abundant genera in the two compartments are shown (A). The colour key represents the relative abundance of each genus in each sample (B).

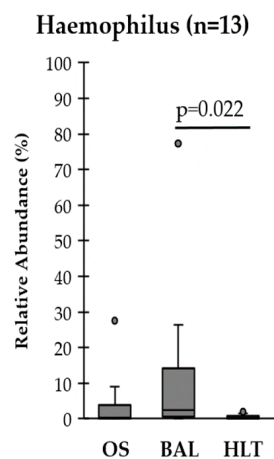

**Figure S4:** Distribution of *Haemophilus* along the respiratory tract.

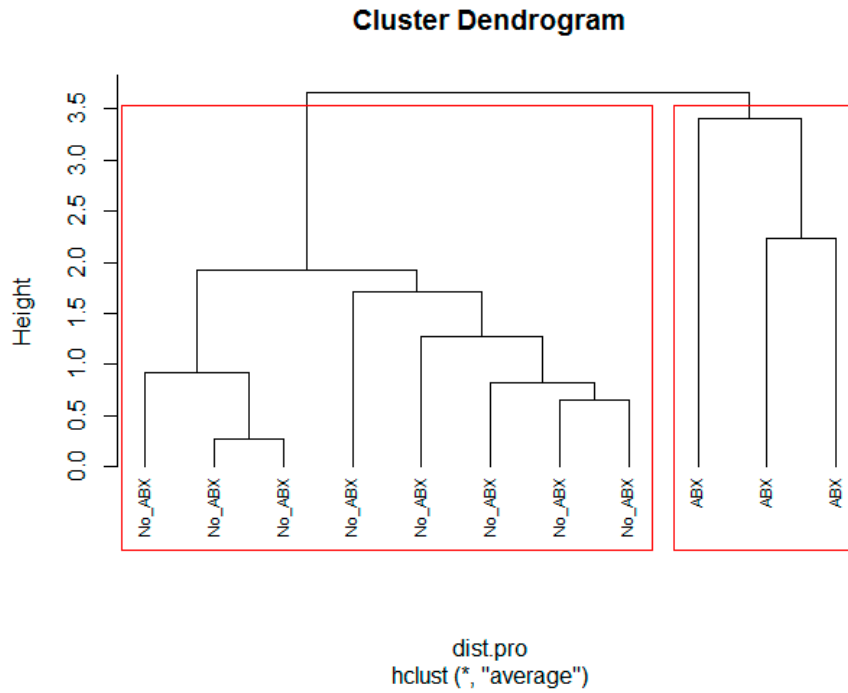

**Figure S5:** Cluster Dendrogram. (ABX = antibiotic therapy)

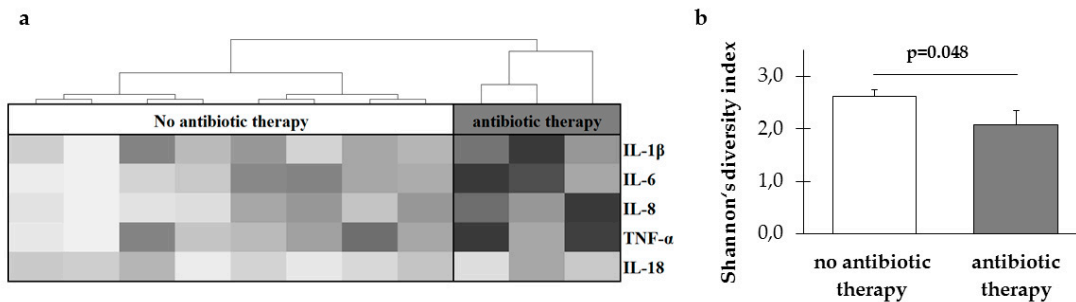

**Figure S6:** Hierarchical cluster analysis based on Euclidean distance (average linkage method) divides the inflammatory cytokines in two groups. One group had no history of prior antibiotic therapy, while the other group had received antibacterials. Cytokine concentration is higher in the group with antibiotic pretreatment during the last 90 days (a), while Shannon's diversity index is significantly lower in this group (b). The shade of colour represents the cytokine concentration (the darker the colour shade the higher is the cytokine concentration).

Two genera encompassing important respiratory pathogens were separately considered and showed a divergent distribution pattern: *Haemophilus* are centered in the lower airways, whereas *Pseudomonas* are more frequently detected in the lung parenchyma. We see also a significant correlation between these two taxa and the proinflammatory cytokine TNF- $\alpha$  concentration in the lung tissue (*Pseudomonas*:  $R = -0,827$ ,  $p = 0,002$ ; *Haemophilus influenzae*:  $R = 0,610$ ,  $p = 0,046$ ) (Table S1).

**Table S1:** Correlation between proinflammatory TNF- $\alpha$  and *Haemophilus influenzae* and *Pseudomonas*

| TNF- $\alpha$                 | Spearman coefficient | Significance p | n  |
|-------------------------------|----------------------|----------------|----|
| <i>Haemophilus influenzae</i> | 0,610                | 0,046          | 11 |

**Table S2:** Silhouette coefficient for the number of clusters

| <b>k (number of cluster)</b> | <b>Silhouette coefficient</b> |
|------------------------------|-------------------------------|
| 2                            | 0.46                          |
| 3                            | 0.33                          |
| 4                            | 0.35                          |

**Table S3:** Removed taxa which were identified as contamination following the decontam algorithm

| <b>Removed contaminants</b>      |
|----------------------------------|
| Hymenobacter                     |
| Chryseobacterium                 |
| Comamonas                        |
| Solirubrobacterales_unclassified |
| Cytophagales_unclassified        |
| Pseudonocardia                   |

**Table S4:** The 20 most abundant Taxa present in isolation controls after removal of taxa given in table S3 (only samples with > 100 reads were included)

| <b>Taxa detected in negative controls</b> |
|-------------------------------------------|
| Veillonella                               |
| Pseudomonas                               |
| Corynebacterium                           |
| Staphylococcus                            |
| Streptococcus                             |
| Enterobacter                              |
| Rothia                                    |
| Enhydrobacter                             |
| Anaerococcus                              |
| Paucibacter                               |
| Enterobacteriae_unclassified              |
| Granulicatella                            |
| Kocuria                                   |
| Actinomyces                               |
| Paracoccus                                |
| Neisseria                                 |
| Garciella                                 |
| Lachnoanaerobaculum                       |
| Capnocytophaga                            |
| Micrococcus                               |

**Table S5:** Additional information on qPCR-Primers and qPCR condition:

|                                         |                                                                                 |
|-----------------------------------------|---------------------------------------------------------------------------------|
| Primer validation                       | Efficiency: 96.45% / r <sup>2</sup> : 0.99 / slope: -3.038 / y-intercept: 31.95 |
| Limit of detection                      | 6 bacterial counts ( <i>E. coli</i> )                                           |
| Amplicon length                         | 348 bp                                                                          |
| Method of C <sub>q</sub> determination  | Abs Quant/Fit Points                                                            |
| C <sub>q</sub> of non-template controls | >35                                                                             |
